# Supplementary material for: Downregulation of Jumonji-C domain-containing protein 5 inhibits proliferation by silibinin in the oral cancer PDTX model
Source: PubMed Central journal article supplement (PMC7367477; doi:10.1371/journal.pone.0236101), 2020-07-17
Supplement: pone.0236101.s001.pdf [file pone.0236101.s001.pdf]

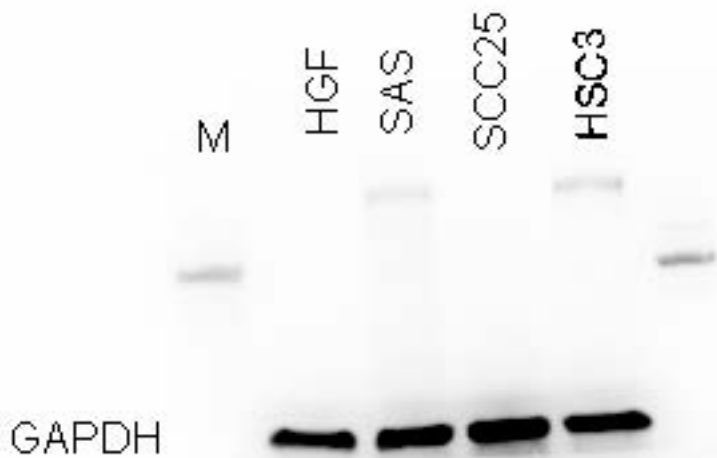

Fig1C

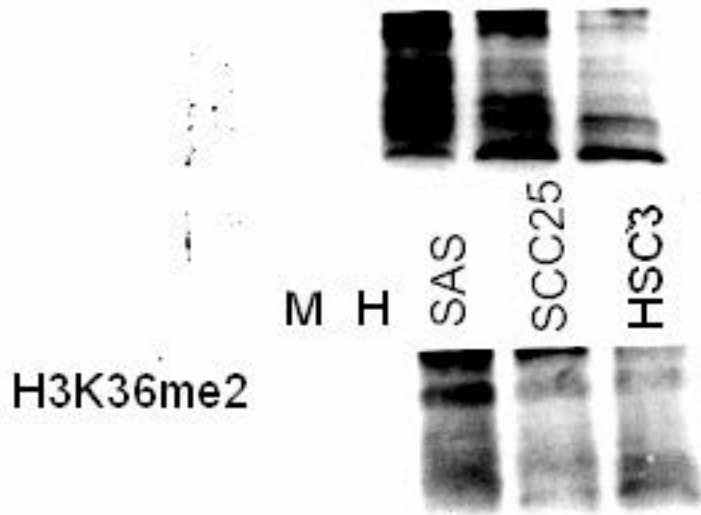

Fig1C

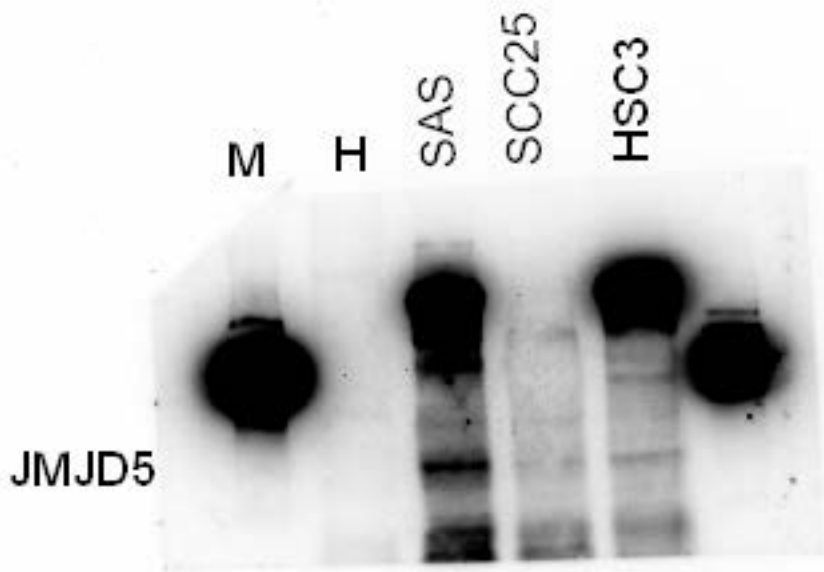

Fig1C

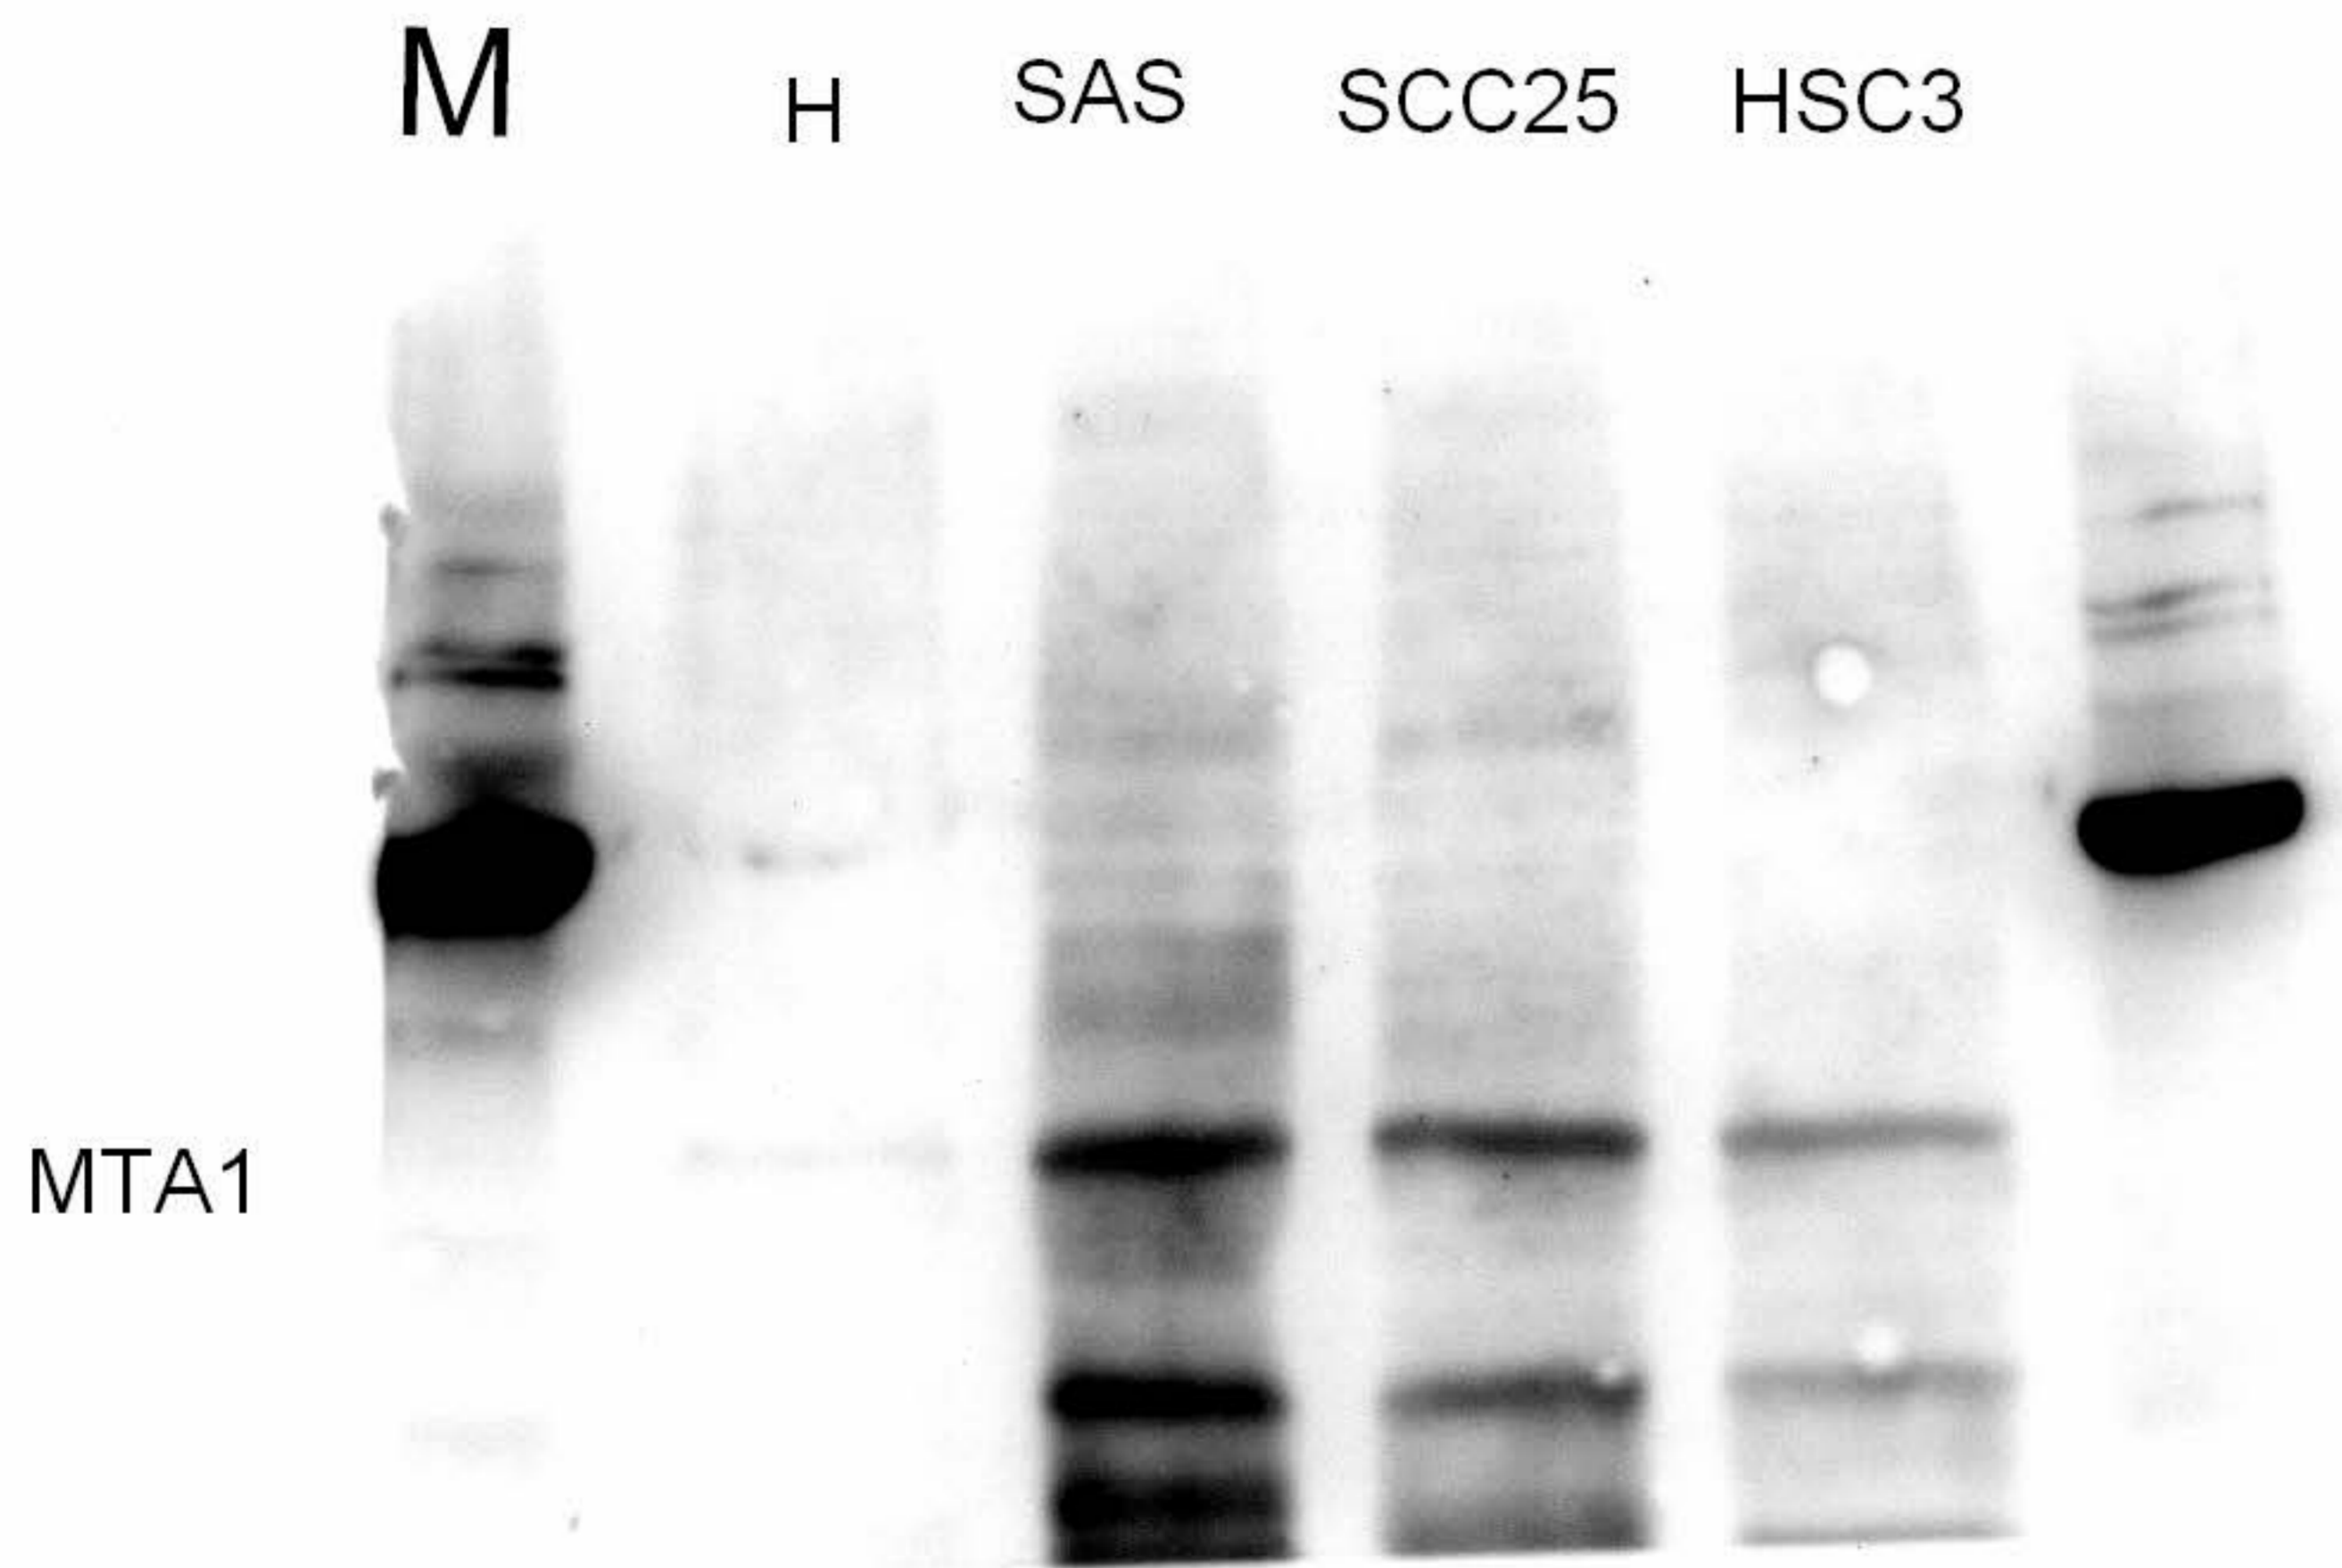

Fig1C

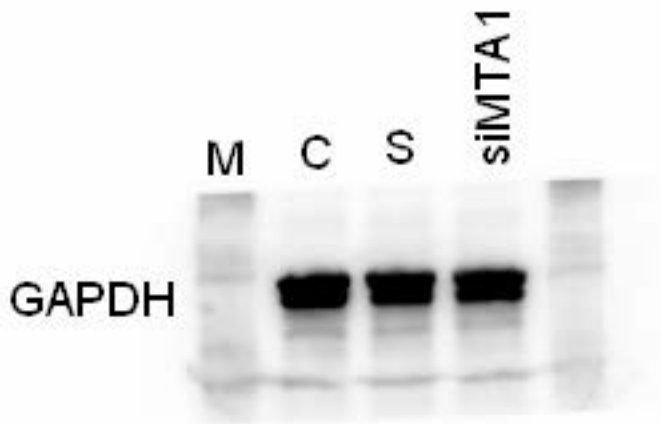

Fig3B

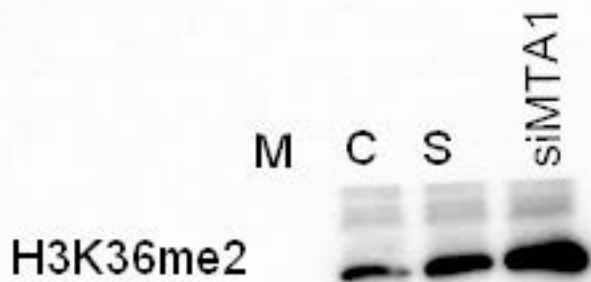

Fig3B

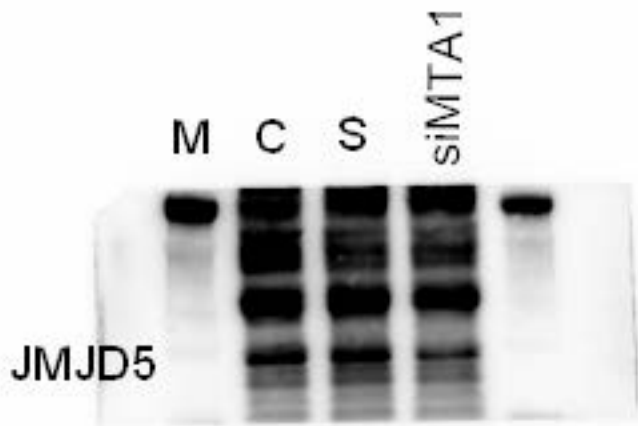

Fig3B

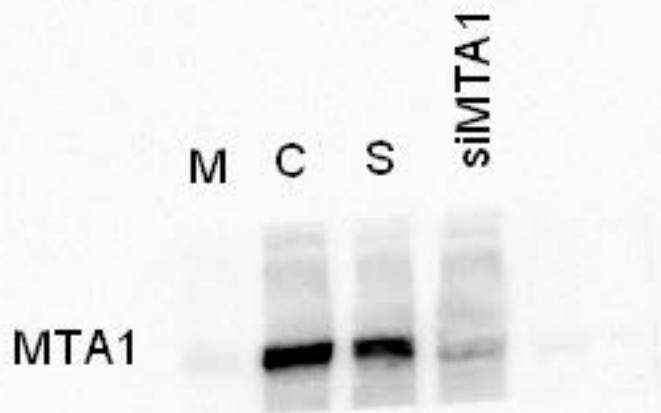

Fig3B



Silibinin concentration (uM)

M

C

50

100

GAPDH

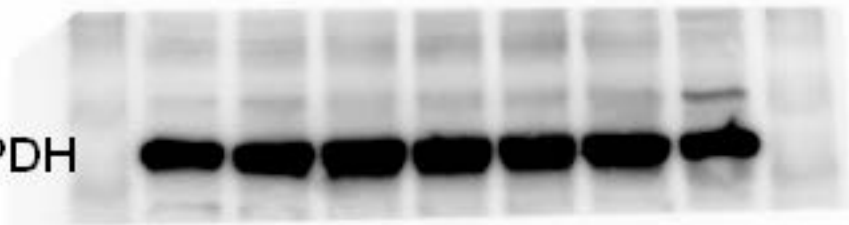

Fig4C

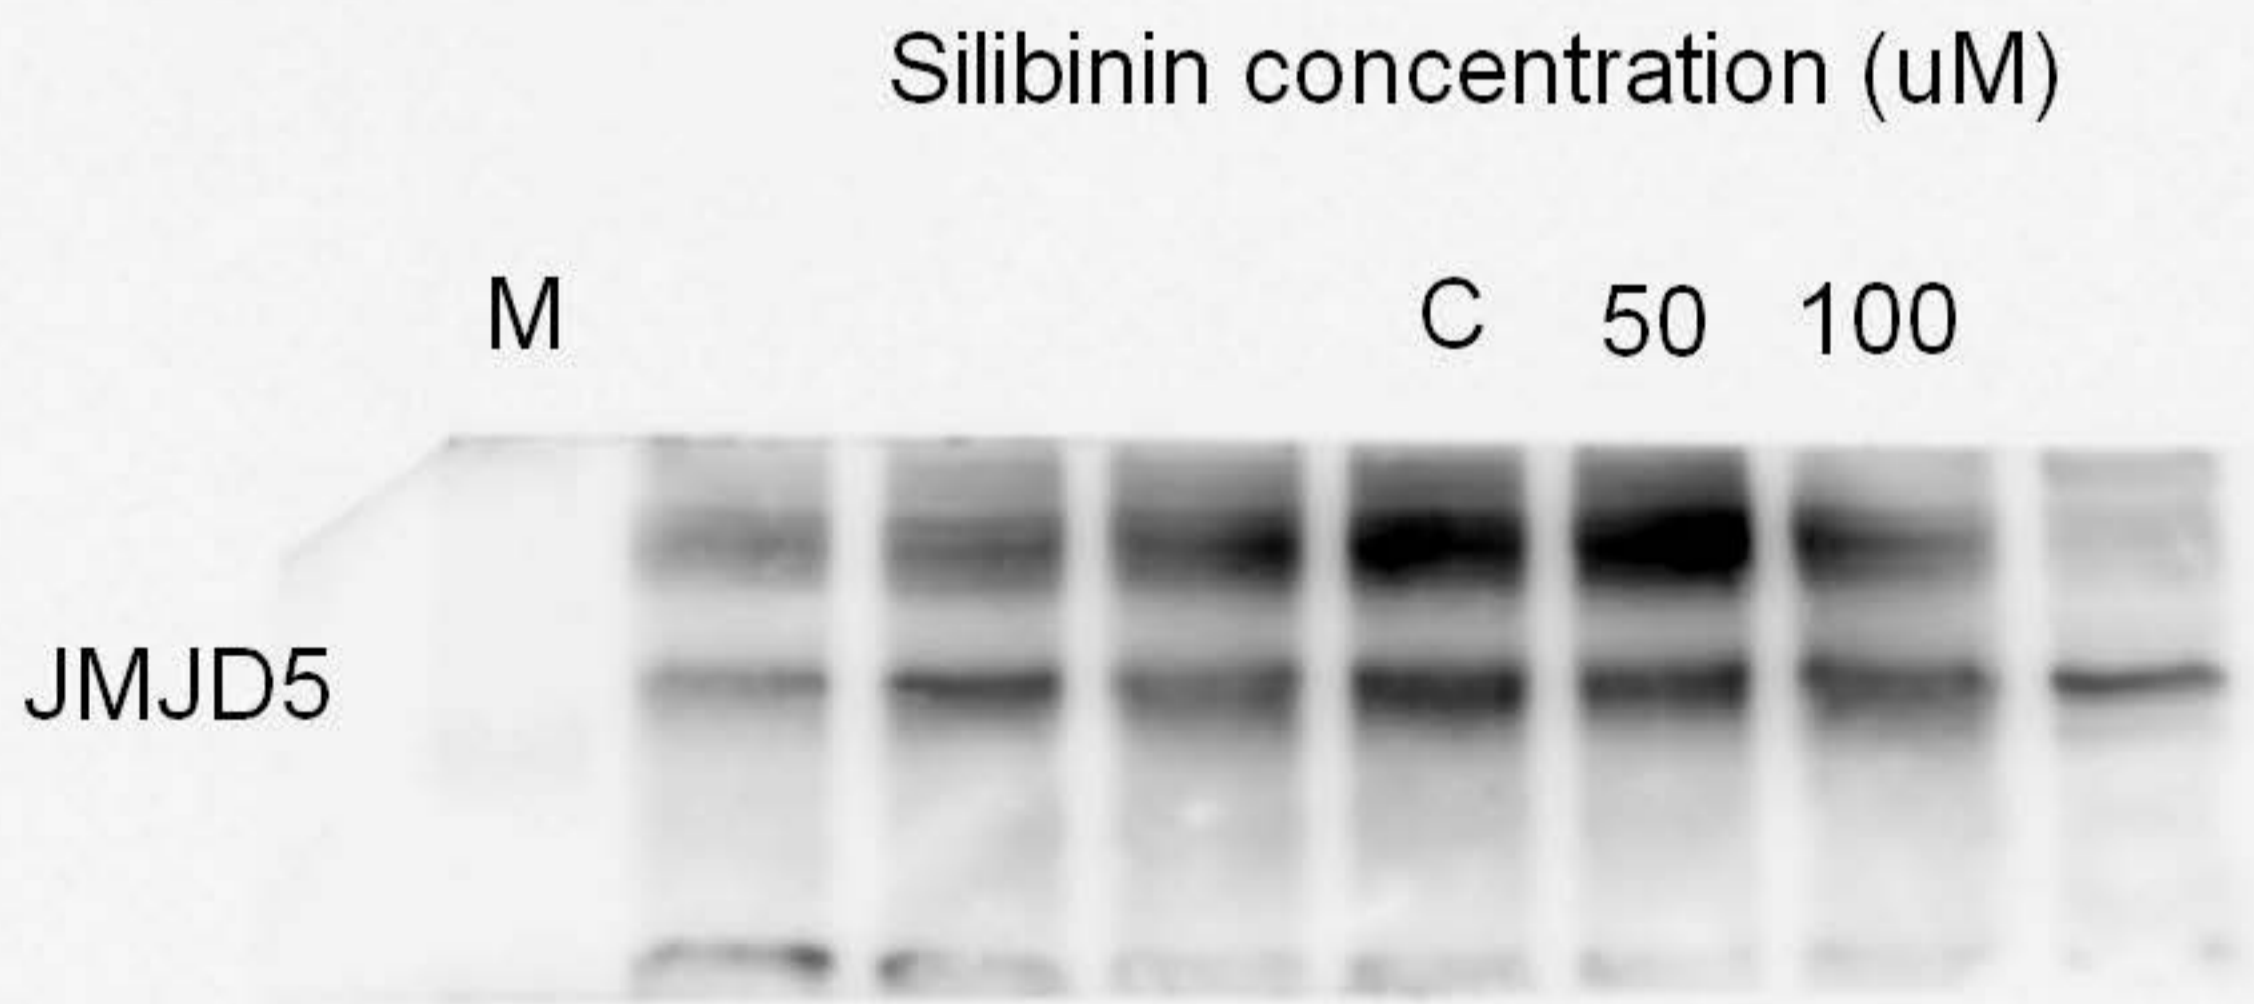

Figure 4C

Silibinin concentration (uM)

M

C

50

100

MTA1

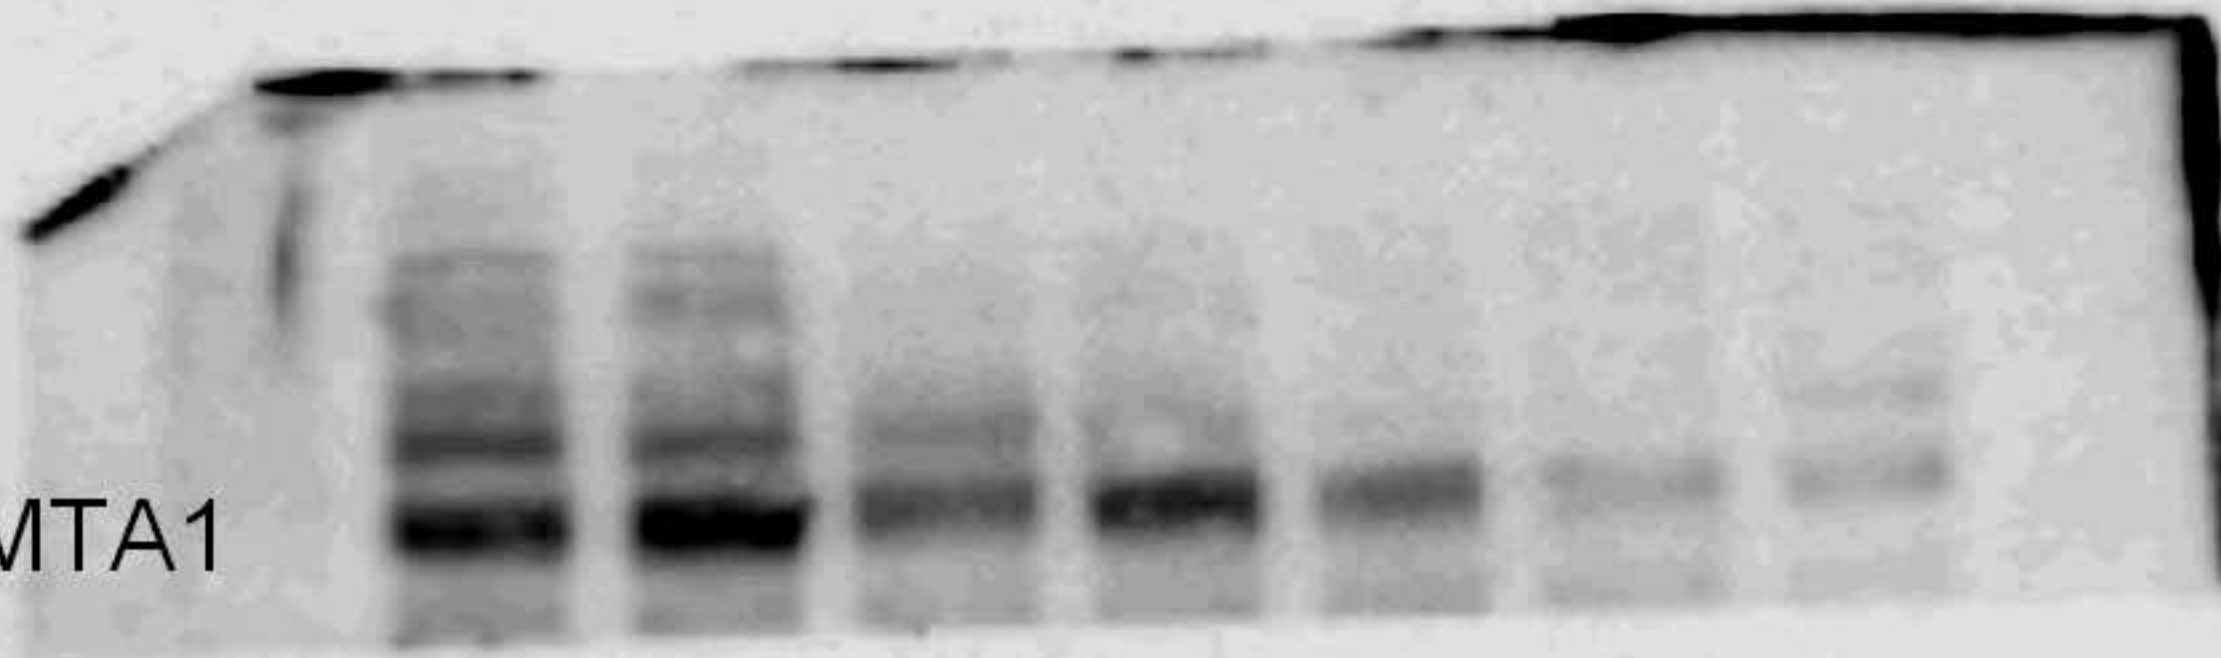

Figure 4C

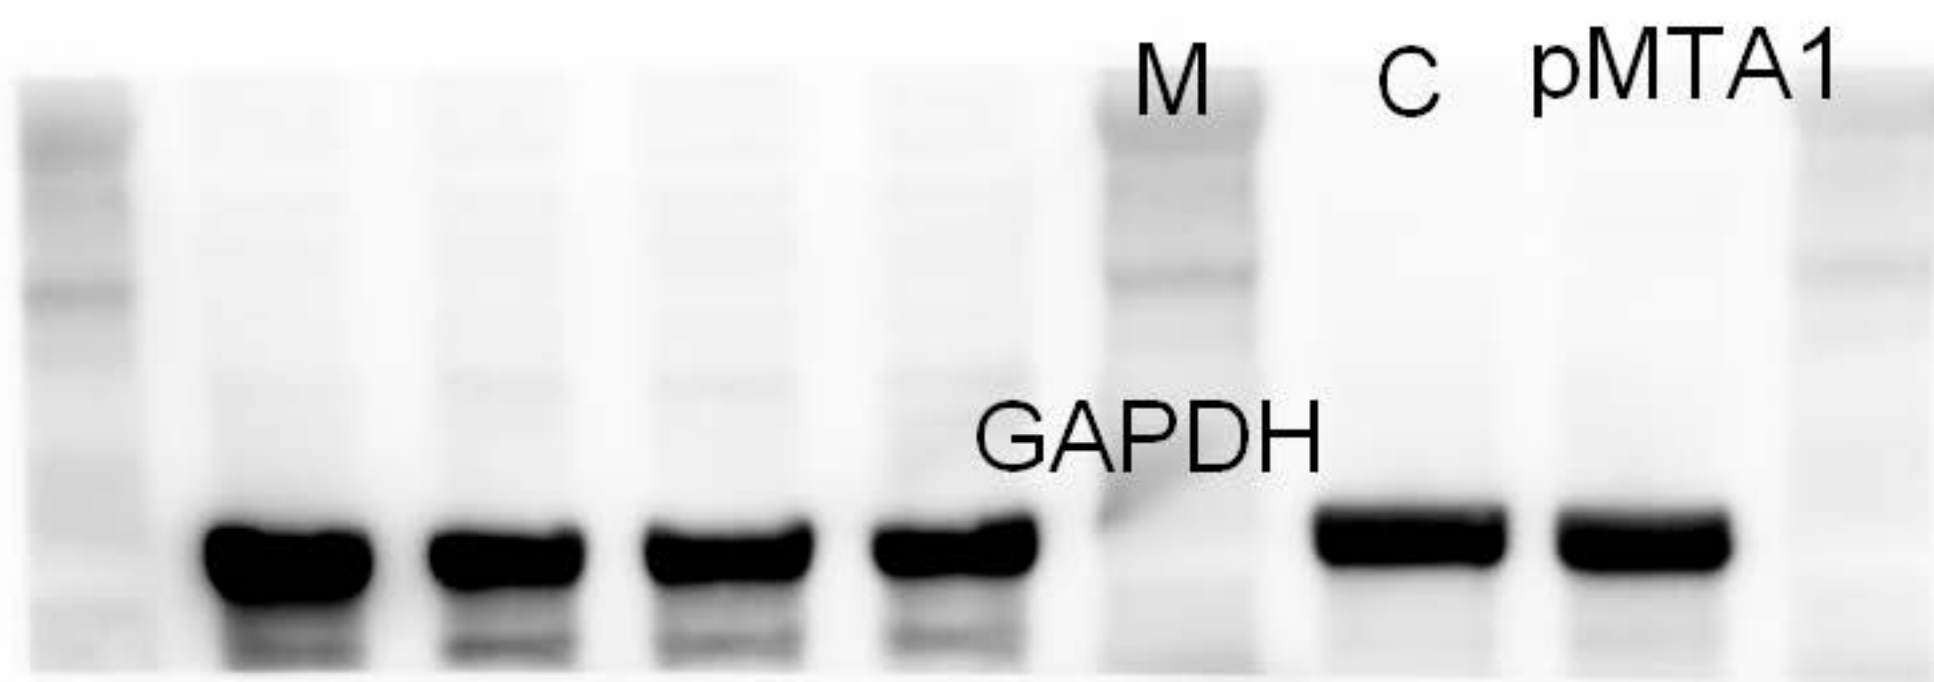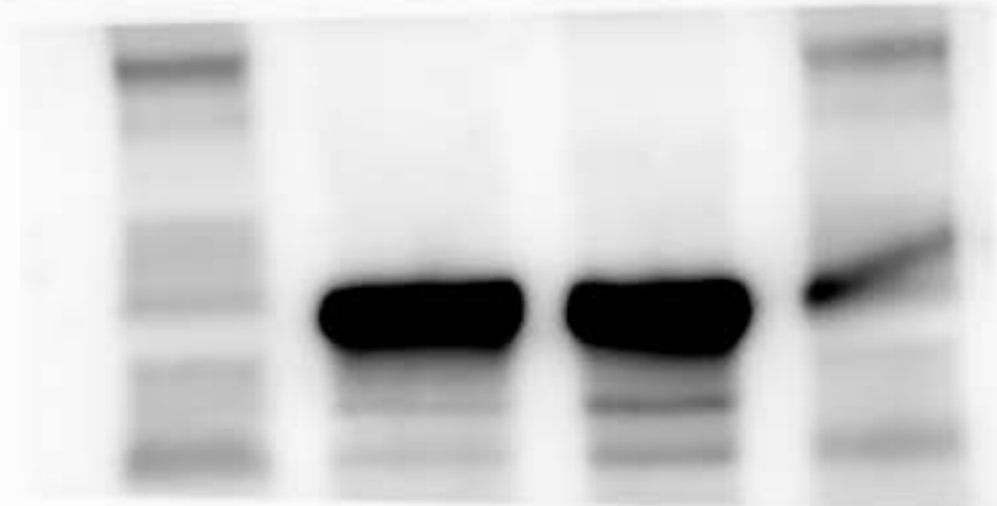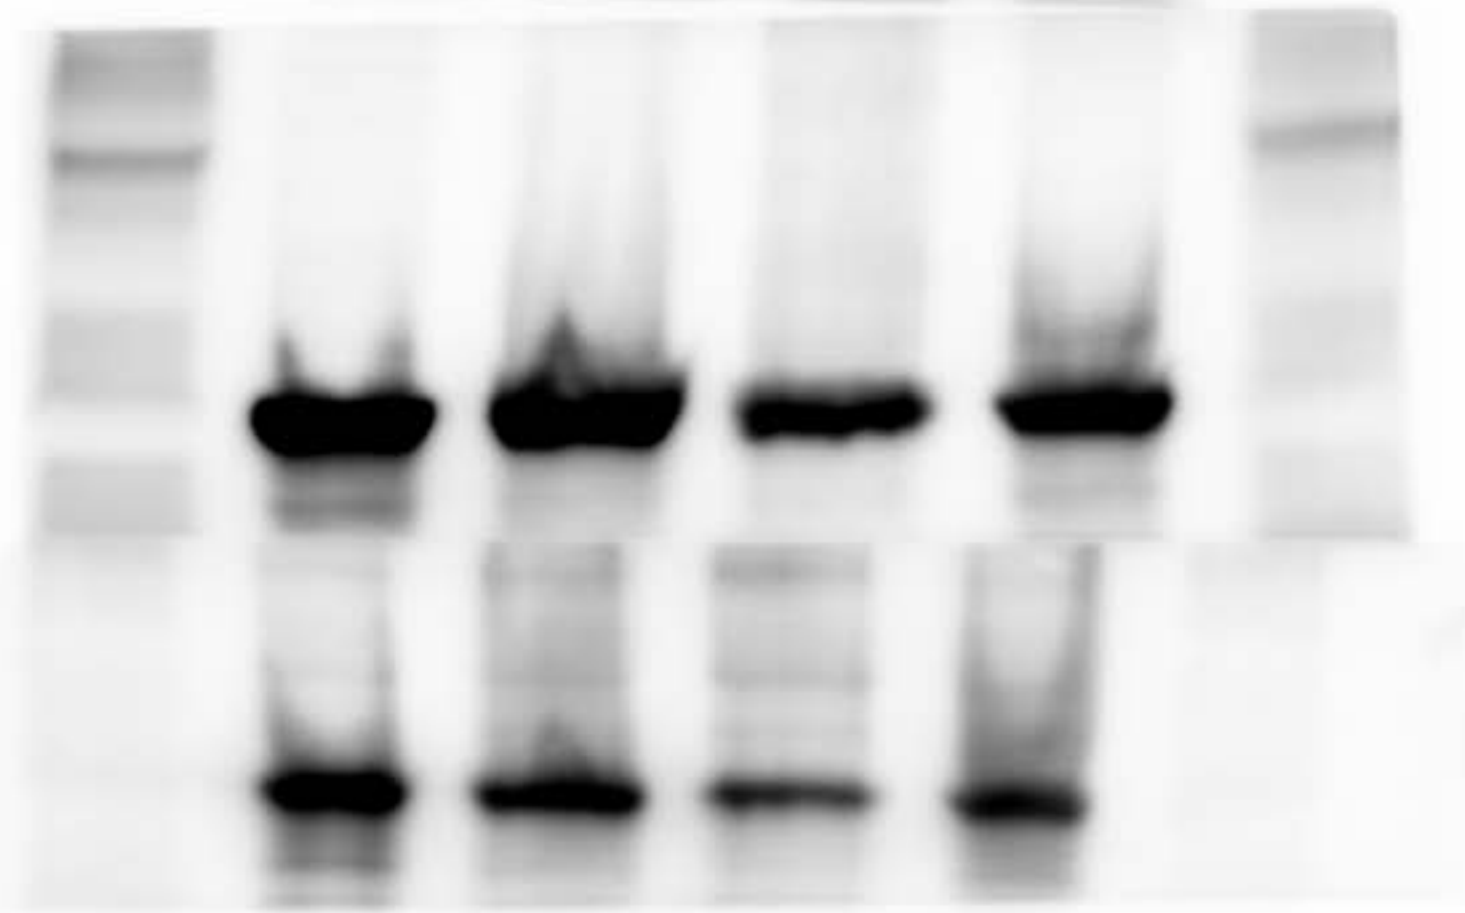

Fig3A

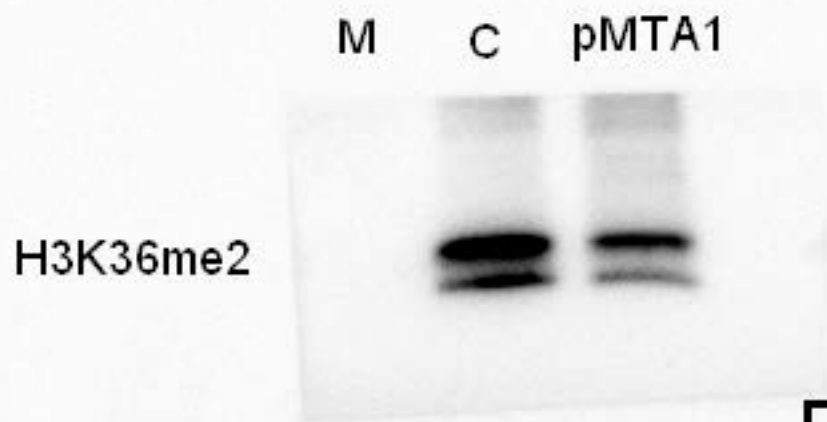

Fig3A

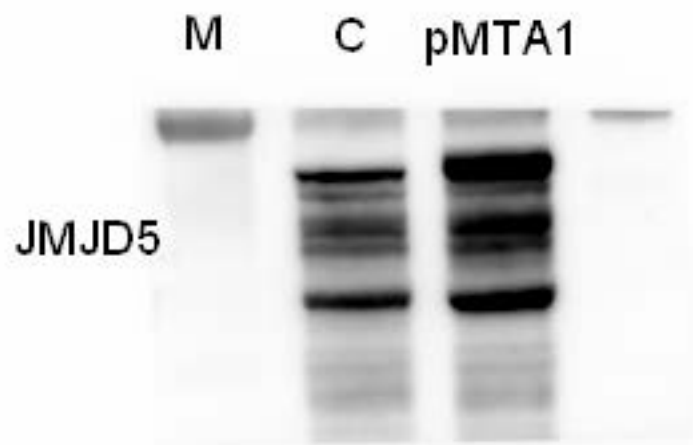

Fig3A

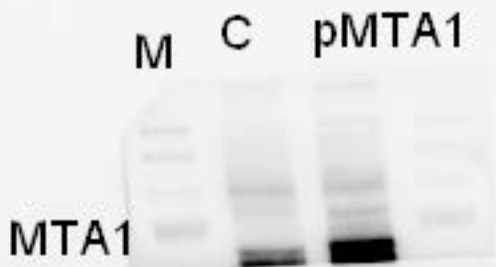

Fig3A
